# Supplementary material for: Inflammatory Markers in Anorexia Nervosa: An Exploratory Study
Source: MDPI journal article supplement (doi:10.3390/nu10111573), 2018-10-24
Supplement: s1 [file s1]

**Supplementary Table 1.** Findings from the linear regressions of potential confounders e.g., age, BMI, percentage fat mass (independent variable), on log-transformed values of inflammatory markers (dependent variable) in the whole sample.

| Inflammatory marker | Age |       |             |               |                                            | BMI |       |              |               |                                            | Percentage fat mass |       |              |               |                                            |
|---------------------|-----|-------|-------------|---------------|--------------------------------------------|-----|-------|--------------|---------------|--------------------------------------------|---------------------|-------|--------------|---------------|--------------------------------------------|
|                     | N   | df    | F           | p             | % variance explained (R <sup>2</sup> *100) | N   | df    | F            | p             | % variance explained (R <sup>2</sup> *100) | N                   | df    | F            | p             | % variance explained (R <sup>2</sup> *100) |
| BDNF                | 40  | 1, 38 | 0.31        | 0.5821        | 0.80%                                      | 40  | 1, 38 | <b>13.86</b> | <b>0.0007</b> | <b>26.47%</b>                              | 39                  | 1, 37 | <b>7.08</b>  | <b>0.0114</b> | <b>16.07%</b>                              |
| bFGF                | 40  | 1, 38 | 0.39        | 0.5350        | 1.02%                                      | 39  | 1, 37 | 0.36         | 0.5526        | 0.96%                                      | 39                  | 1, 37 | 0.34         | 0.5651        | 0.90%                                      |
| CRP                 | 40  | 1, 38 | 1.68        | 0.2022        | 4.24%                                      | 40  | 1, 38 | 0.10         | 0.7584        | 0.25%                                      | 39                  | 1, 37 | 0.10         | 0.7512        | 0.27%                                      |
| Eotaxin             | 39  | 1, 37 | 1.33        | 0.2557        | 3.48%                                      | 40  | 1, 38 | 0.29         | 0.5906        | 0.77%                                      | 39                  | 1, 37 | 0.33         | 0.5693        | 0.88%                                      |
| Eotaxin-3           | 39  | 1, 37 | <b>5.68</b> | <b>0.0224</b> | <b>13.32%</b>                              | 39  | 1, 37 | 3.05         | 0.0889        | 7.62%                                      | 38                  | 1, 36 | 1.75         | 0.1940        | 4.64%                                      |
| Flt-1               | 37  | 1, 35 | 1.91        | 0.1757        | 5.17%                                      | 37  | 1, 35 | 0.04         | 0.8493        | 0.01%                                      | 37                  | 1, 35 | 1.64         | 0.2090        | 4.47%                                      |
| GM-CSF              | 35  | 1, 33 | 0.01        | 0.9163        | 0.03%                                      | 35  | 1, 33 | 0.78         | 0.3835        | 2.31%                                      | 33                  | 1, 31 | 3.55         | 0.0691        | 10.26%                                     |
| ICAM-1              | 40  | 1, 38 | 0.61        | 0.4401        | 1.58%                                      | 40  | 1, 38 | 0.05         | 0.8258        | 0.13%                                      | 38                  | 1, 36 | 1.84         | 0.1834        | 4.86%                                      |
| IFN-γ               | 35  | 1, 33 | <b>7.91</b> | <b>0.0082</b> | <b>19.34%</b>                              | 37  | 1, 35 | 2.63         | 0.1140        | 6.98%                                      | 36                  | 1, 34 | 0.05         | 0.8294        | 0.14%                                      |
| IL-1α               | 39  | 1, 37 | 0.88        | 0.3554        | 2.31%                                      | 39  | 1, 37 | 1.43         | 0.2394        | 3.72%                                      | 38                  | 1, 36 | 0.03         | 0.8613        | 0.09%                                      |
| IL-1β               | 30  | 1, 28 | 0.75        | 0.3932        | 2.62%                                      | 30  | 1, 28 | 0.73         | 0.4000        | 2.54%                                      | 30                  | 1, 28 | 0.71         | 0.4062        | 2.48%                                      |
| IL-2                | 19  | 1, 17 | 2.40        | 0.1397        | 12.37%                                     | 19  | 1, 17 | 0.00         | 0.9484        | 0.03%                                      | 18                  | 1, 16 | 0.02         | 0.8927        | 0.12%                                      |
| IL-4                | 36  | 1, 34 | 0.02        | 0.9012        | 0.05%                                      | 36  | 1, 34 | <b>4.73</b>  | <b>0.0367</b> | <b>12.21%</b>                              | 35                  | 1, 33 | 1.34         | 0.2545        | 3.92%                                      |
| IL-5                | 35  | 1, 33 | 0.47        | 0.4961        | 1.41%                                      | 35  | 1, 33 | 2.25         | 0.1431        | 6.38%                                      | 34                  | 1, 32 | 1.89         | 0.1791        | 5.57%                                      |
| IL-6                | 40  | 1, 38 | 0.02        | 0.8903        | 0.05%                                      | 40  | 1, 38 | <b>9.48</b>  | <b>0.0039</b> | <b>19.96%</b>                              | 39                  | 1, 37 | <b>8.83</b>  | <b>0.0052</b> | <b>19.27%</b>                              |
| IL-7                | 40  | 1, 38 | 2.20        | 0.1464        | 5.47%                                      | 40  | 1, 38 | 0.09         | 0.7642        | 0.24%                                      | 39                  | 1, 37 | 0.02         | 0.8794        | 0.06%                                      |
| IL-8                | 40  | 1, 38 | 1.54        | 0.2217        | 3.90%                                      | 40  | 1, 38 | 0.07         | 0.7925        | 0.18%                                      | 39                  | 1, 37 | 0.42         | 0.5200        | 1.13%                                      |
| IL-10               | 39  | 1, 37 | 0.17        | 0.6829        | 0.46%                                      | 39  | 1, 37 | <b>6.67</b>  | <b>0.0139</b> | <b>15.26%</b>                              | 38                  | 1, 36 | 2.79         | 0.1035        | 7.20%                                      |
| IL-12/IL-23p40      | 40  | 1, 38 | 0.70        | 0.4073        | 1.81%                                      | 40  | 1, 38 | <b>10.97</b> | <b>0.0020</b> | <b>22.40%</b>                              | 39                  | 1, 37 | <b>10.05</b> | <b>0.0031</b> | <b>21.37%</b>                              |
| IL-12p70            | 34  | 1, 32 | 0.16        | 0.6910        | 0.50%                                      | 34  | 1, 32 | 0.02         | 0.8775        | 0.08%                                      | 34                  | 1, 32 | 0.12         | 0.7283        | 0.38%                                      |
| IL-13               | 26  | 1, 24 | 0.51        | 0.4817        | 2.08%                                      | 26  | 1, 24 | 1.61         | 0.2160        | 6.30%                                      | 26                  | 1, 24 | 1.50         | 0.2322        | 5.89%                                      |
| IL-15               | 40  | 1, 38 | 0.27        | 0.6056        | 0.71%                                      | 40  | 1, 38 | <b>9.54</b>  | <b>0.0037</b> | <b>20.07%</b>                              | 39                  | 1, 37 | 1.42         | 0.2415        | 3.69%                                      |
| IL-16               | 40  | 1, 38 | 0.29        | 0.5919        | 0.76%                                      | 40  | 1, 38 | 1.00         | 0.3245        | 2.55%                                      | 39                  | 1, 37 | 0.42         | 0.5188        | 1.13%                                      |
| IL-17A              | 37  | 1, 35 | 0.14        | 0.7148        | 0.39%                                      | 37  | 1, 35 | 3.97         | 0.0542        | 10.18%                                     | 36                  | 1, 34 | 1.44         | 0.2382        | 4.07%                                      |
| IP-10               | 35  | 1, 33 | 1.01        | 0.3233        | 2.96%                                      | 40  | 1, 38 | 0.98         | 0.3282        | 2.52%                                      | 39                  | 1, 37 | 0.35         | 0.5595        | 0.93%                                      |
| MCP-1               | 40  | 1, 38 | <b>8.87</b> | <b>0.0050</b> | <b>18.92%</b>                              | 40  | 1, 38 | 1.88         | 0.1784        | 4.71%                                      | 39                  | 1, 37 | 1.17         | 0.2854        | 3.08%                                      |

|                |    |       |             |               |               |    |       |             |               |               |    |       |             |               |               |
|----------------|----|-------|-------------|---------------|---------------|----|-------|-------------|---------------|---------------|----|-------|-------------|---------------|---------------|
| MCP-4          | 40 | 1, 38 | 1.05        | 0.3127        | 2.68%         | 40 | 1, 38 | 1.30        | 0.2621        | 3.30%         | 39 | 1, 37 | 0.15        | 0.6961        | 0.42%         |
| MIP-1 $\alpha$ | 40 | 1, 38 | <b>4.48</b> | <b>0.0408</b> | <b>10.55%</b> | 40 | 1, 38 | 0.07        | 0.7991        | 0.17%         | 39 | 1, 37 | 0.13        | 0.7254        | 0.34%         |
| MIP-1 $\beta$  | 40 | 1, 38 | 1.14        | 0.2920        | 2.92%         | 40 | 1, 38 | 2.07        | 0.1584        | 5.17%         | 39 | 1, 37 | 1.46        | 0.2347        | 3.79%         |
| PIGF           | 40 | 1, 38 | 0.00        | 0.9508        | 0.01%         | 40 | 1, 38 | 0.02        | 0.8882        | 0.05%         | 39 | 1, 37 | 0.10        | 0.7581        | 0.26%         |
| SAA            | 40 | 1, 38 | <b>6.99</b> | <b>0.0119</b> | <b>15.53%</b> | 40 | 1, 38 | 0.25        | 0.6226        | 0.64%         | 39 | 1, 37 | 0.35        | 0.5603        | 0.93%         |
| TARC           | 38 | 1, 36 | 0.12        | 0.7320        | 0.33%         | 38 | 1, 36 | 0.02        | 0.8785        | 0.07%         | 37 | 1, 35 | 0.66        | 0.4214        | 1.86%         |
| Tie-2          | 39 | 1, 37 | 0.66        | 0.4206        | 1.76%         | 39 | 1, 37 | 1.00        | 0.3230        | 2.64%         | 38 | 1, 36 | 1.77        | 0.1914        | 4.69%         |
| TNF- $\alpha$  | 40 | 1, 38 | <b>5.07</b> | <b>0.0302</b> | <b>11.78%</b> | 39 | 1, 37 | 0.04        | 0.8452        | 0.10%         | 39 | 1, 37 | 0.32        | 0.5730        | 0.87%         |
| TNF- $\beta$   | 37 | 1, 35 | 1.41        | 0.2431        | 3.87%         | 37 | 1, 35 | <b>7.45</b> | <b>0.0098</b> | <b>17.56%</b> | 36 | 1, 34 | <b>4.93</b> | <b>0.0331</b> | <b>12.67%</b> |
| VCAM-1         | 40 | 1, 38 | 2.10        | 0.1555        | 5.24%         | 40 | 1, 38 | 1.76        | 0.1924        | 4.43%         | 39 | 1, 37 | 2.20        | 0.1468        | 5.60%         |
| VEGF-A         | 40 | 1, 38 | 0.74        | 0.3953        | 1.91%         | 40 | 1, 38 | 3.14        | 0.0763        | 7.63%         | 39 | 1, 37 | 0.91        | 0.3453        | 2.41%         |
| VEGF-C         | 40 | 1, 38 | 1.18        | 0.2850        | 3.00%         | 39 | 1, 37 | <b>6.17</b> | <b>0.0177</b> | <b>14.28%</b> | 39 | 1, 37 | <b>5.00</b> | <b>0.0315</b> | <b>11.90%</b> |
| VEGF-D         | 40 | 1, 38 | 0.99        | 0.3260        | 2.54%         | 40 | 1, 38 | 1.79        | 0.1890        | 4.50%         | 39 | 1, 37 | 0.13        | 0.7200        | 0.35%         |

\*Results in bold text indicate statistical significance at  $p < 0.05$ .

Abbreviations: df—degrees of freedom; BMI—body mass index; BDNF—brain-derived neurotrophic factor; bFGF—basic fibroblast growth factor; CRP—C-reactive protein; Flt-1—Fms-like tyrosine kinase-1; GM-CSF—granulocyte-macrophage colony-stimulating factor; ICAM-1—intercellular adhesion molecule-1; IFN- $\gamma$ —interferon-  $\gamma$ ; IL—interleukin; IP-10—interferon  $\gamma$ -induced protein-10; MCP—monocyte chemoattractant protein; MIP—macrophage inflammatory protein; PIGF—placental growth factor; SAA—serum amyloid A; TARC—thymus and activation-regulated chemokine; Tie-2—tyrosine kinase-2; TNF—tumor necrosis factor; VCAM-1—vascular cell adhesion molecule-1; VEGF—vascular endothelial growth factor.
