# Supplementary material for: Inflammatory Markers in Anorexia Nervosa: An Exploratory Study
Source: MDPI journal article supplement (doi:10.3390/nu10111573), 2018-10-24
Supplement: s1 [file s1]

**Supplementary Table 2.** Findings from the linear regressions of illness severity (independent variable) on log-transformed values of inflammatory markers (dependent variable) in AN patients only.

| Inflammatory marker | Illness duration |       |              |               |                                            | Eating Disorder Symptoms |       |      |        |                                            | General psychopathology |       |             |               |                                            |
|---------------------|------------------|-------|--------------|---------------|--------------------------------------------|--------------------------|-------|------|--------|--------------------------------------------|-------------------------|-------|-------------|---------------|--------------------------------------------|
|                     | N                | df    | F            | p             | % variance explained (R <sup>2</sup> *100) | N                        | df    | F    | p      | % variance explained (R <sup>2</sup> *100) | N                       | df    | F           | p             | % variance explained (R <sup>2</sup> *100) |
| BDNF                | 24               | 1, 22 | 0.29         | 0.5952        | 1.30%                                      |                          |       |      |        |                                            |                         |       |             |               |                                            |
| bFGF                | 24               | 1, 22 | 3.88         | 0.0615        | 15.00%                                     | 26                       | 1, 24 | 3.75 | 0.0647 | 13.51%                                     | 27                      | 1, 25 | 0.61        | 0.4427        | 2.38%                                      |
| CRP                 | 24               | 1, 22 | 0.09         | 0.7720        | 0.39%                                      | 27                       | 1, 25 | 0.80 | 0.8000 | 3.10%                                      | 27                      | 1, 25 | 0.74        | 0.3978        | 2.87%                                      |
| Eotaxin             | 24               | 1, 22 | 0.49         | 0.4916        | 2.17%                                      | 27                       | 1, 25 | 1.06 | 0.3124 | 4.08%                                      | 27                      | 1, 25 | <b>4.80</b> | <b>0.0380</b> | <b>16.11%</b>                              |
| Eotaxin-3           | 24               | 1, 22 | 1.43         | 0.2446        | 6.10%                                      | 27                       | 1, 25 | 3.18 | 0.0866 | 11.29%                                     | 27                      | 1, 25 | 4.07        | 0.0546        | 13.99%                                     |
| Flt-1               | 23               | 1, 21 | 4.03         | 0.0577        | 16.10%                                     | 26                       | 1, 24 | 1.05 | 0.3162 | 4.18%                                      | 26                      | 1, 24 | 1.76        | 0.1968        | 6.84%                                      |
| GM-CSF              | 18               | 1, 16 | 2.21         | 0.1566        | 12.13%                                     | 21                       | 1, 19 | 0.00 | 0.9572 | 0.02%                                      | 21                      | 1, 19 | 0.02        | 0.9029        | 0.08%                                      |
| ICAM-1              | 24               | 1, 22 | 0.71         | 0.4072        | 3.14%                                      | 26                       | 1, 24 | 2.20 | 0.1510 | 8.40%                                      | 26                      | 1, 24 | 0.89        | 0.3538        | 3.59%                                      |
| IFN-γ               | 24               | 1, 22 | 0.00         | 0.9518        | 0.02%                                      | 27                       | 1, 25 | 3.87 | 0.0605 | 13.39%                                     | 24                      | 1, 22 | 0.33        | 0.5688        | 1.50%                                      |
| IL-1α               | 23               | 1, 21 | 0.17         | 0.6802        | 0.83%                                      | 26                       | 1, 24 | 0.93 | 0.3446 | 3.73%                                      | 26                      | 1, 24 | 0.00        | 0.9776        | 0.00%                                      |
| IL-1β               | 20               | 1, 18 | 4.07         | 0.0588        | 18.44%                                     | 21                       | 1, 19 | 0.18 | 0.6749 | 0.95%                                      | 21                      | 1, 19 | 0.12        | 0.7375        | 0.61%                                      |
| IL-2                | 12               | 1, 10 | 2.40         | 0.1522        | 19.37%                                     | 13                       | 1, 11 | 0.18 | 0.6796 | 1.61%                                      | 13                      | 1, 11 | 0.05        | 0.8219        | 0.48%                                      |
| IL-4                | 20               | 1, 18 | <b>15.82</b> | <b>0.0009</b> | <b>46.77%</b>                              | 23                       | 1, 21 | 0.15 | 0.7068 | 0.69%                                      | 23                      | 1, 21 | 0.21        | 0.6541        | 0.97%                                      |
| IL-5                | 21               | 1, 19 | 0.00         | 0.9586        | 0.01%                                      | 23                       | 1, 21 | 0.58 | 0.4538 | 2.70%                                      | 23                      | 1, 21 | 1.47        | 0.2389        | 6.54%                                      |
| IL-6                | 24               | 1, 22 | 0.79         | 0.3828        | 3.48%                                      | 27                       | 1, 25 | 1.43 | 0.2436 | 5.40%                                      | 27                      | 1, 25 | 0.01        | 0.9130        | 0.05%                                      |
| IL-7                | 24               | 1, 22 | 0.32         | 0.5794        | 1.42%                                      | 27                       | 1, 25 | 1.33 | 0.2594 | 5.06%                                      | 27                      | 1, 25 | <b>4.51</b> | <b>0.0439</b> | <b>15.27%</b>                              |
| IL-8                | 24               | 1, 22 | 1.47         | 0.2386        | 6.25%                                      | 27                       | 1, 25 | 1.22 | 0.2801 | 4.65%                                      | 27                      | 1, 25 | <b>9.88</b> | <b>0.0043</b> | <b>28.32%</b>                              |
| IL-10               | 23               | 1, 21 | 2.23         | 0.1500        | 9.61%                                      | 26                       | 1, 24 | 4.02 | 0.0563 | 14.36%                                     | 26                      | 1, 24 | 0.32        | 0.5742        | 1.33%                                      |
| IL-12/IL-23p40      | 23               | 1, 21 | <b>6.70</b>  | <b>0.0172</b> | <b>24.19%</b>                              | 27                       | 1, 25 | 2.15 | 0.1554 | 7.91%                                      | 27                      | 1, 25 | 0.00        | 0.9833        | 0.00%                                      |
| IL-12p70            | 22               | 1, 20 | 1.35         | 0.2595        | 6.31%                                      | 24                       | 1, 22 | 0.00 | 0.9723 | 0.01%                                      | 24                      | 1, 22 | 0.03        | 0.8691        | 0.13%                                      |
| IL-13               | 14               | 1, 12 | 0.70         | 0.4201        | 5.49%                                      | 17                       | 1, 15 | 1.99 | 0.1793 | 11.69%                                     | 17                      | 1, 15 | 0.71        | 0.4119        | 4.53%                                      |

|                |    |       |             |               |               |    |       |              |               |               |    |       |             |               |               |
|----------------|----|-------|-------------|---------------|---------------|----|-------|--------------|---------------|---------------|----|-------|-------------|---------------|---------------|
| IL-15          | 23 | 1, 21 | 0.38        | 0.5446        | 1.77%         | 26 | 1, 24 | 3.81         | 0.0628        | 13.69%        | 27 | 1, 25 | 0.50        | 0.4874        | 1.95%         |
| IL-16          | 24 | 1, 22 | 2.29        | 0.1445        | 9.43%         | 27 | 1, 25 | 1.82         | 0.1897        | 6.78%         | 27 | 1, 25 | 3.60        | 0.0695        | 12.58%        |
| IL-17A         | 22 | 1, 20 | 2.28        | 0.1463        | 10.25%        | 25 | 1, 23 | 0.31         | 0.5831        | 1.33%         | 25 | 1, 23 | 0.02        | 0.8796        | 0.10%         |
| IP-10          | 23 | 1, 21 | 2.27        | 0.1469        | 9.75%         | 25 | 1, 23 | <b>12.60</b> | <b>0.0017</b> | <b>35.40%</b> | 27 | 1, 25 | <b>6.10</b> | <b>0.0207</b> | <b>19.62%</b> |
| MCP-1          | 23 | 1, 21 | <b>6.40</b> | <b>0.0194</b> | <b>23.37%</b> | 27 | 1, 25 | 0.48         | 0.4952        | 1.88%         | 27 | 1, 25 | <b>5.52</b> | <b>0.0270</b> | <b>18.08%</b> |
| MCP-4          | 24 | 1, 22 | 0.70        | 0.4110        | 3.09%         | 27 | 1, 25 | 0.05         | 0.8218        | 0.21%         | 27 | 1, 25 | 0.29        | 0.5967        | 1.14%         |
| MIP-1 $\alpha$ | 24 | 1, 22 | 4.12        | 0.0548        | 15.76%        | 27 | 1, 25 | 0.80         | 0.3811        | 3.08%         | 27 | 1, 25 | 1.42        | 0.2443        | 5.38%         |
| MIP-1 $\beta$  | 23 | 1, 21 | 0.00        | 0.9976        | 0.00%         | 26 | 1, 24 | 1.49         | 0.2339        | 5.85%         | 26 | 1, 24 | 0.01        | 0.9299        | 0.03%         |
| PIGF           | 24 | 1, 22 | 0.01        | 0.9284        | 0.04%         | 27 | 1, 25 | <b>4.44</b>  | <b>0.0454</b> | <b>15.07%</b> | 27 | 1, 25 | 2.88        | 0.1019        | 10.34%        |
| SAA            | 24 | 1, 22 | 1.84        | 0.1882        | 7.73%         | 27 | 1, 25 | 3.27         | 0.0827        | 11.56%        | 27 | 1, 25 | 1.67        | 0.2082        | 6.26%         |
| TARC           | 23 | 1, 21 | 0.55        | 0.4662        | 2.56%         | 25 | 1, 23 | 3.59         | 0.0709        | 13.49%        | 24 | 1, 22 | <b>9.18</b> | <b>0.0062</b> | <b>29.44%</b> |
| Tie-2          | 23 | 1, 21 | 0.53        | 0.4740        | 2.47%         | 26 | 1, 24 | 1.20         | 0.2849        | 4.75%         | 26 | 1, 24 | 1.93        | 0.1781        | 7.43%         |
| TNF- $\alpha$  | 24 | 1, 22 | 3.09        | 0.0926        | 12.32%        | 27 | 1, 25 | 0.49         | 0.4903        | 1.92%         | 26 | 1, 24 | 0.01        | 0.9373        | 0.03%         |
| TNF- $\beta$   | 22 | 1, 20 | 0.26        | 0.6170        | 1.27%         | 26 | 1, 24 | 0.85         | 0.3667        | 3.41%         | 26 | 1, 24 | 3.52        | 0.0730        | 12.78%        |
| VCAM-1         | 24 | 1, 22 | 2.01        | 0.1706        | 8.36%         | 27 | 1, 25 | 0.18         | 0.6739        | 0.72%         | 27 | 1, 25 | 0.83        | 0.3703        | 3.22%         |
| VEGF-A         | 24 | 1, 22 | <b>5.55</b> | <b>0.0278</b> | <b>20.15%</b> | 27 | 1, 25 | 0.44         | 0.5119        | 1.74%         | 27 | 1, 25 | 0.08        | 0.7758        | 0.33%         |
| VEGF-C         | 24 | 1, 22 | 0.00        | 0.9459        | 0.02%         | 27 | 1, 25 | 2.91         | 0.1006        | 10.42%        | 27 | 1, 25 | 1.83        | 0.1886        | 6.81%         |
| VEGF-D         | 24 | 1, 22 | 2.59        | 0.1220        | 10.52%        | 27 | 1, 25 | 0.00         | 0.9805        | 0.00%         | 27 | 1, 25 | 1.89        | 0.1812        | 7.03%         |

\*Results in bold text indicate statistical significance at  $p < 0.05$ .

Abbreviations: df—degrees of freedom; BDNF—brain-derived neurotrophic factor; bFGF—basic fibroblast growth factor; CRP—C-reactive protein; Flt-1—Fms-like tyrosine kinase-1; GM-CSF—granulocyte-macrophage colony-stimulating factor; ICAM-1—intercellular adhesion molecule-1, IFN- $\gamma$ —interferon-  $\gamma$ ; IL—interleukin; IP-10—interferon  $\gamma$ -induced protein-10; MCP—monocyte chemoattractant protein; MIP—macrophage inflammatory protein; PIGF—placental growth factor; SAA—serum amyloid A; TARC—thymus and activation-regulated chemokine; Tie-2—tyrosine kinase-2; TNF—tumor necrosis factor; VCAM-1—vascular cell adhesion molecule-1; VEGF—vascular endothelial growth factor.
